# Supplementary material for: Effects of Age and Biological Age-Determining Factors on Telomere Length in Type 2 Diabetes Mellitus Patients
Source: MDPI journal article supplement (doi:10.3390/medicina60050698), 2024-04-24
Supplement: s1 [file s1]

**Supplemental Table S1: Oligomers (Standards and Primers) used for qPCR analysis of  
Telomere Length**

| Oligomer Type | Oligomers        | Sequence (5'-3')                                                    | Amplicon Size |
|---------------|------------------|---------------------------------------------------------------------|---------------|
| Standards     | Telomere         | TTAGGGTTAGGGTTAGGGTTAGGGTTAGGGT                                     | 84 bp         |
|               | Standard         | TAGGGTTAGGGTTAGGGTTAGGGTTAGGGTT<br>AGGGTTAGGGTTAGGGTTAGGG           |               |
|               | β-Globin/<br>SCG | GCTTCTGACACAACCTGTGTTCACTAGCAACC<br>TCAAACAGACACCATGGTGCATCTGACTCCT | 120 bp        |
|               | Standard         | GAGGAGAAGTCTGCCGTTACTGCCCTGTGGG<br>GCAAGGTGAACGTGGATGAAGTTGGTG      |               |
| Primers       | Telo-F           | CGGTTTGTTTGGGTTTGGGTTTGGGTTTGGG<br>TTTGGGTT                         | >76 bp        |
|               | Telo-R           | GGCTTGCCTTACCCTTACCCTTACCC<br>TTACCCTTACCCT                         |               |
|               | SCG-F            | GCTTCTGACACAACCTGTGTTCACTAGC                                        | 82 bp         |
|               | SCG-R            | CACCAACTTCATCCACGTTTCACC                                            |               |

**Supplemental Table S2: Reaction Mix for 20 µl of Final Volume**

| TELOMERE   |         |             | SCG        |         |             |
|------------|---------|-------------|------------|---------|-------------|
| Components | Volumes | Final Conc. | Components | Volumes | Final Conc. |

|                        |         |       |                        |         |       |
|------------------------|---------|-------|------------------------|---------|-------|
| Master mix             | 10 µl   | 1X    | Master mix             | 10 µl   | 1X    |
| DNA or serial dilution | 2 µl    | 10 ng | DNA or serial dilution | 2 µl    | 10 ng |
| Telo F                 | 0.75 µl |       | SCG F                  | 0.75 µl |       |
| Telo R                 | 1.25 µl |       | SCG R                  | 1.25 µl |       |
| H <sub>2</sub> O       | 6 µl    |       | H <sub>2</sub> O       | 6 µl    |       |
| <b>Final Volume</b>    | 20 µl   |       |                        | 20 µl   |       |
